# Supplementary material for: Solvent-driven structural topology involving energetically significant intra- and intermolecular chelate ring contacts and anticancer activities of Cu(ii) phenanthroline complexes involving benzoates: experimental and theoretical studies
Source: Royal Society of Chemistry journal article supplement (doi:10.1039/c9ra01181a), 2019-01-01
Supplement: c9ra01181a1.pdf [file c9ra01181a1.pdf]

1 **Supplementary Information**

2 **3.2 Infrared Spectroscopy**

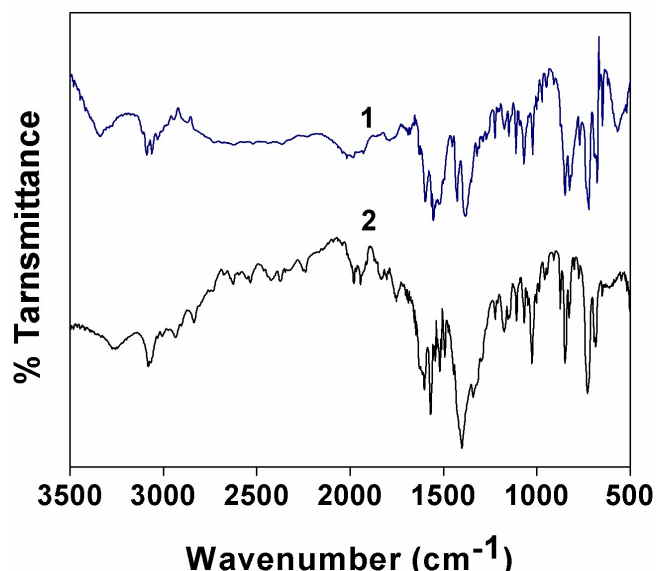

5 **Fig. S1** FTIR spectra of **1** and **2** in KBr phase

6

7 FT-IR spectra of the compounds **1** and **2** (KBr phase) were recorded in the region 3500–  
8 400  $\text{cm}^{-1}$  (**Fig. S1**). For complexes **1** and **2**, strong absorption bands appearing at 1602  $\text{cm}^{-1}$  and  
9 1607  $\text{cm}^{-1}$  respectively for the asymmetric stretching and 1385  $\text{cm}^{-1}$  and 1398  $\text{cm}^{-1}$  respectively  
10 for the symmetric stretching of the carboxylate groups. The difference between the asymmetric  
11 and symmetric stretching vibrations for **1** and **2** are 217  $\text{cm}^{-1}$  and 209  $\text{cm}^{-1}$  respectively which  
12 suggest that benzoate ligand behaves as a bi-chelating oxygen donor<sup>47</sup> ligand in **1** and bidentate  
13 ligand in **2** at the metal centers. The bands in the region of 3420–3450  $\text{cm}^{-1}$  for both the  
14 complexes **1** and **2** could be assigned to the stretching vibration of the water involving hydrogen  
15 bonding.<sup>48</sup> The ring stretching vibrations [ $\nu(\text{C}=\text{C})$  and  $\nu(\text{C}=\text{N})$ ] of phenanthroline moiety for both  
16 the compounds observed in expected positions. The IR frequencies for  $\delta(\text{C}-\text{H})$  vibrations of  
17 phen in **1** and **2** respectively around 720 and 633  $\text{cm}^{-1}$  are shifted to around 840  $\text{cm}^{-1}$  and 799  $\text{cm}^{-1}$   
18 suggesting the coordination of phenanthroline to the Cu(II) metal centers. The strong  
19 absorption bands at 1386  $\text{cm}^{-1}$  suggest the presence of free nitrate in **1**.<sup>49</sup>

20

### 21 3.3 Electronic spectra of 1 and 2

22

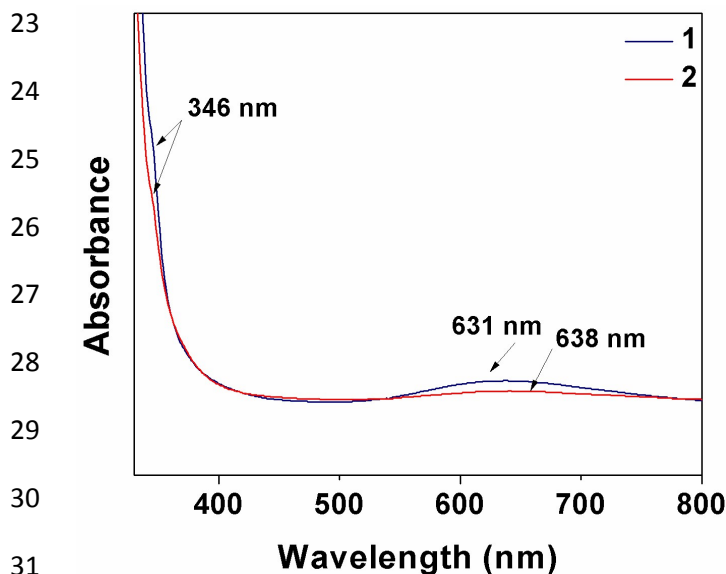

(a)

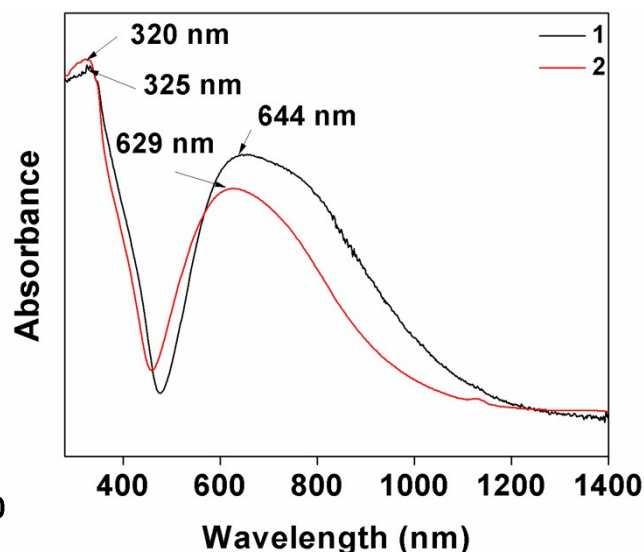

(b)

34 **Fig. S2** (a) UV-Vis spectra of **1** and **2** in aqueous phase (b) UV-Vis-NIR spectra of **1** and **2** in solid phase

35

36

37 We have recorded the UV-Vis spectra of both the complexes **1** and **2**, in solid state as

38 well as in solution. In the UV-Vis absorption spectra of **1** and **2**, the sharp and intense absorption

39 band around 346 nm corresponds to the ligand to metal charge transfer transition (**Fig. S2a**).

40 However, the presence of broad absorption band for **1** around 631 nm is due to the distortion of

41 the compound around the Cu(II) centers in the aqueous phase. In complex **2**, a broad visible

42 absorption band at 638 nm may be attributed to the  ${}^2E_g \rightarrow {}^2T_{2g}$  transition for octahedral

43 complexes.<sup>50</sup> The UV-Vis-NIR spectrum of compound **1** (**Fig S2b**) shows a broad asymmetric

44 band (644 nm) with expected splitting for the local  $C_{4v}$  symmetry of the Cu(II) centers in the

45 square pyramidal geometry. The UV-Vis-NIR spectrum of **2** (**Fig. S2b**) shows broad absorption

46 at 629 nm which may be thought to result from the splitting of the usual  ${}^2E_g \rightarrow {}^2T_{2g}$  transition for

47 octahedral complexes.<sup>51</sup> The UV bands originating from the ligand to metal charge transfer

48 transition found in the expected positions for both the complexes.<sup>52</sup>

49
